# Supplementary material for: ‘Aggregation induced emission’ active iridium(iii) complexes with applications in mitochondrial staining
Source: Royal Society of Chemistry journal article supplement (doi:10.1039/c6ra24792j), 2017-01-01
Supplement: c6ra24792j1.pdf [file c6ra24792j1.pdf]

# 'Aggregation Induced Emission' Active Iridium(III) Complexes with Applications in Mitochondrial Staining

Parvej Alam<sup>a</sup>, Subhra Dash<sup>b</sup>, Claudia Climent<sup>c</sup>, Gurpreet Kaur<sup>d</sup>, Angshuman Roy Choudhury<sup>d</sup>, David Casanova<sup>c</sup>, Pere Alemany<sup>c</sup>, Rajdeep Chowdhury<sup>\*b</sup>, Inamur Rahaman Laskar<sup>\*a</sup>

<sup>a</sup>Department of Chemistry, Birla Institute of Technology and Science, Pilani Campus, Pilani, Rajasthan, India, [ir\\_laskar@bits-pilani.ac.in](mailto:ir_laskar@bits-pilani.ac.in);  
<sup>b</sup>Department of Biology, Birla Institute of Technology and Science, Pilani Campus, Pilani, Rajasthan, India, [rajdeep.chowdhury@pilani.bits-pilani.ac.in](mailto:rajdeep.chowdhury@pilani.bits-pilani.ac.in); <sup>c</sup>Departament de Ciència de Materials i Química Física and Institut de Química Teòrica i Computacional (IQTCUB), Universitat de Barcelona, Martí i Franquès 1-11, Barcelona 08028, Spain, [p.alemany@ub.edu](mailto:p.alemany@ub.edu); <sup>d</sup>Department of Chemical Sciences, Indian Institute of Science Education and Research (IISER), Mohali, Sector 81, S. A. S. Nagar, Manauli PO, Mohali, Punjab, 140306, India, [angshurc@iisermohali.ac.in](mailto:angshurc@iisermohali.ac.in); <sup>\*</sup>Kimika Fakultatea, Euskal Herriko Unibertsitatea (UPV/EHU), Donostia International Physics Center, Paseo Manuel de Lardiazabal, 4, Donostia 20018, Euskadi, Spain.

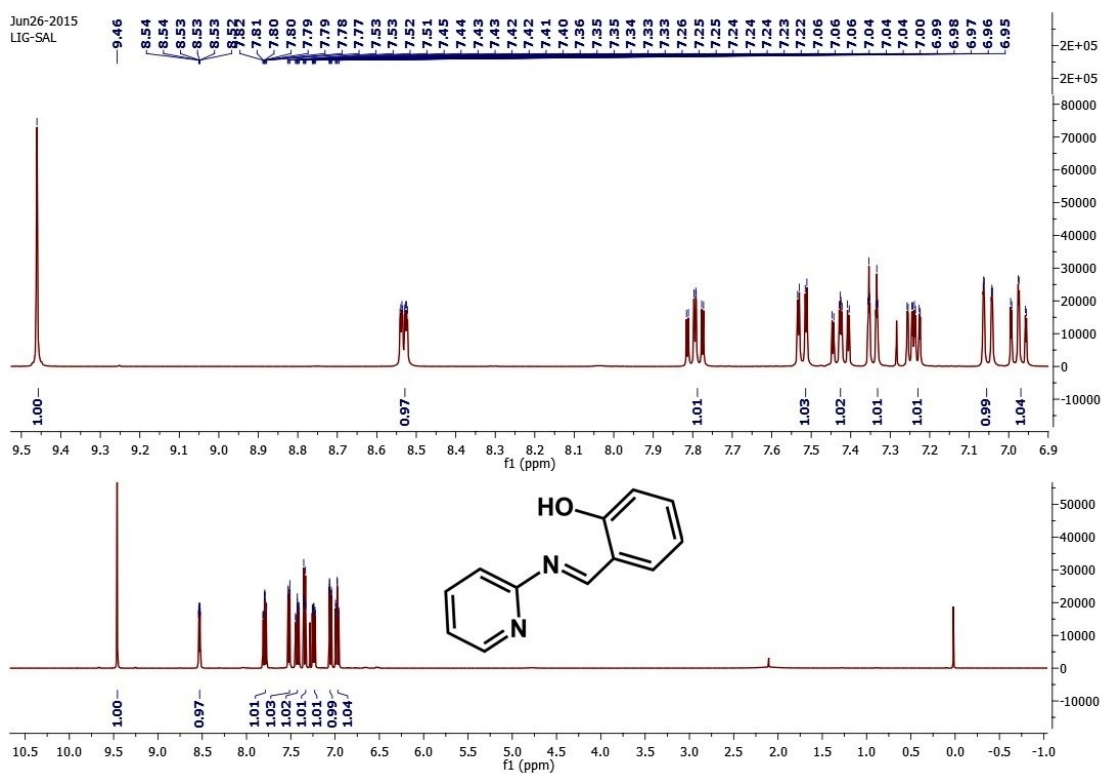

(a)

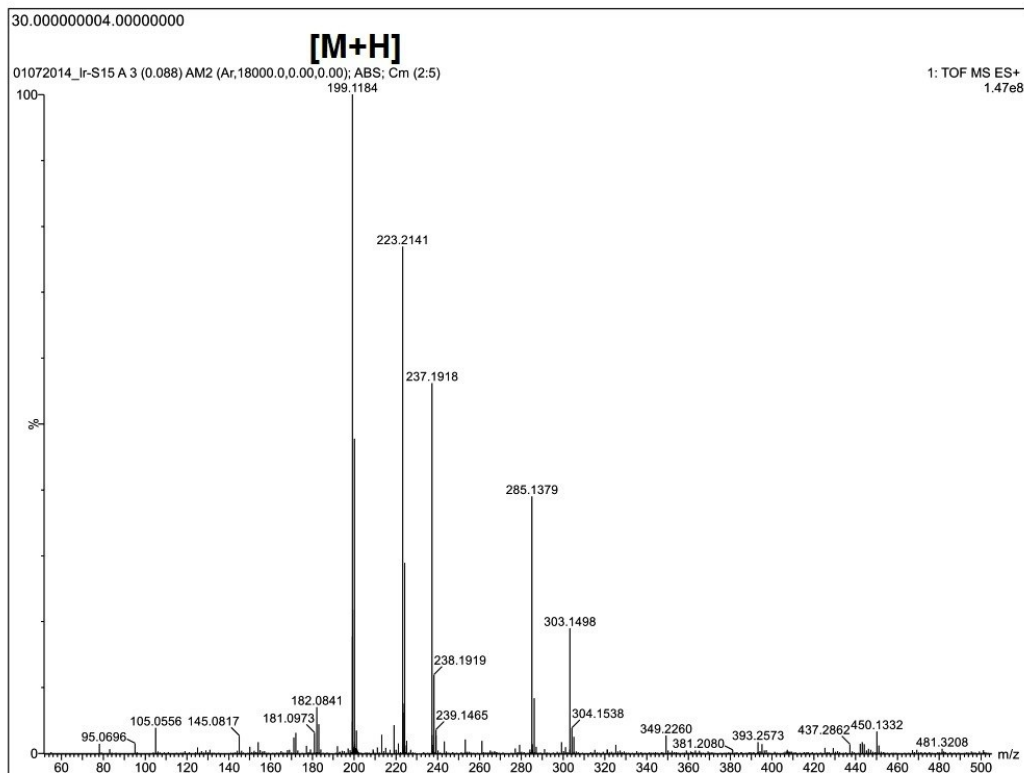

(b)

Fig.S1:  $^1\text{H}$ , NMR spectra and HRMS (a and b), respectively for **L**.

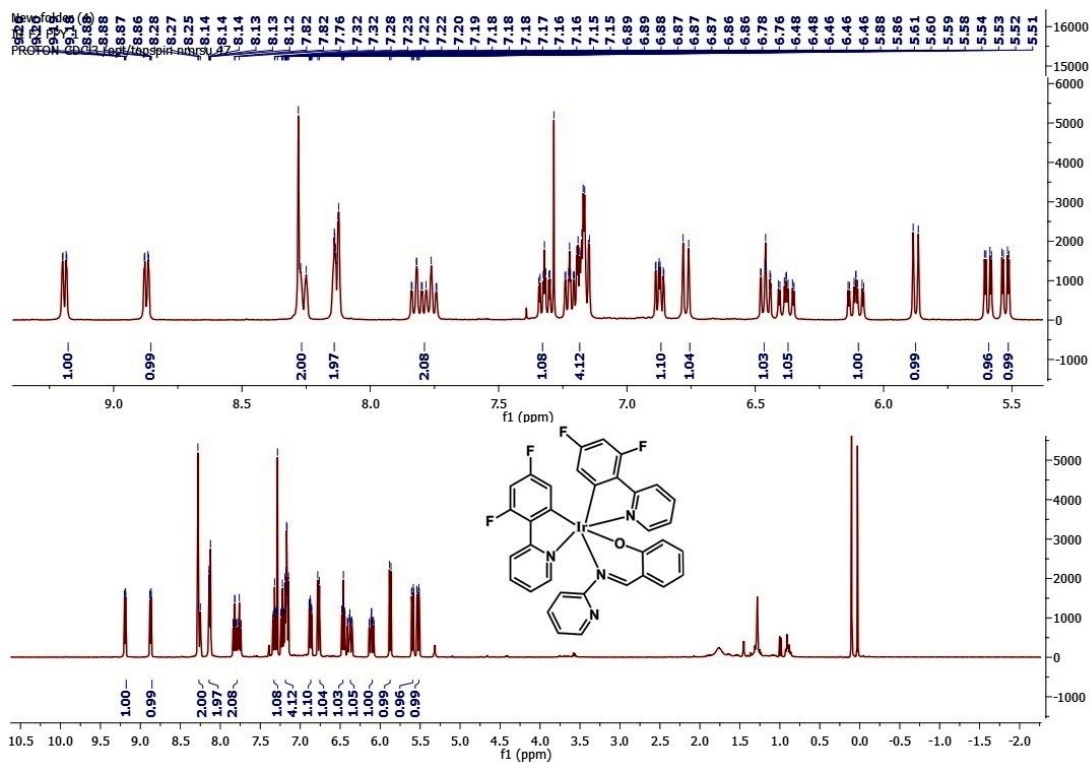

(a)

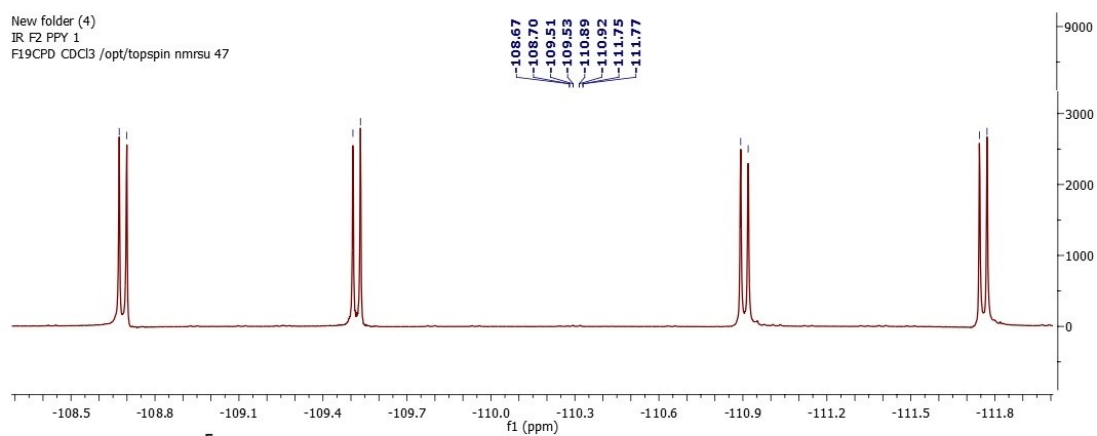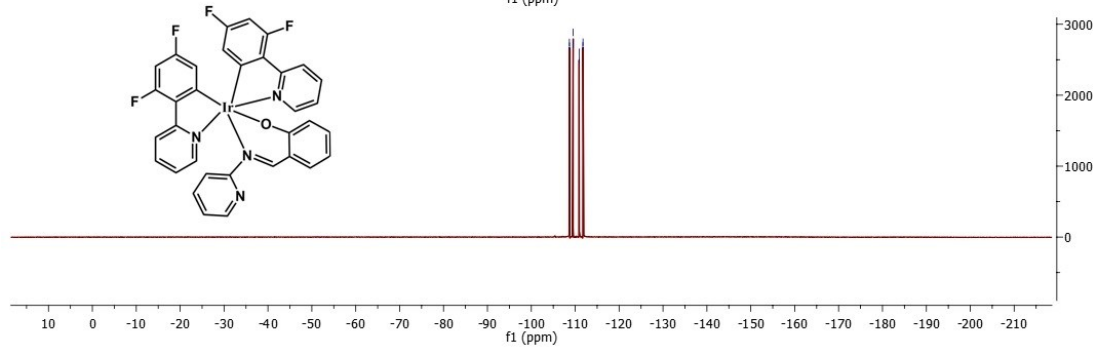

(b)

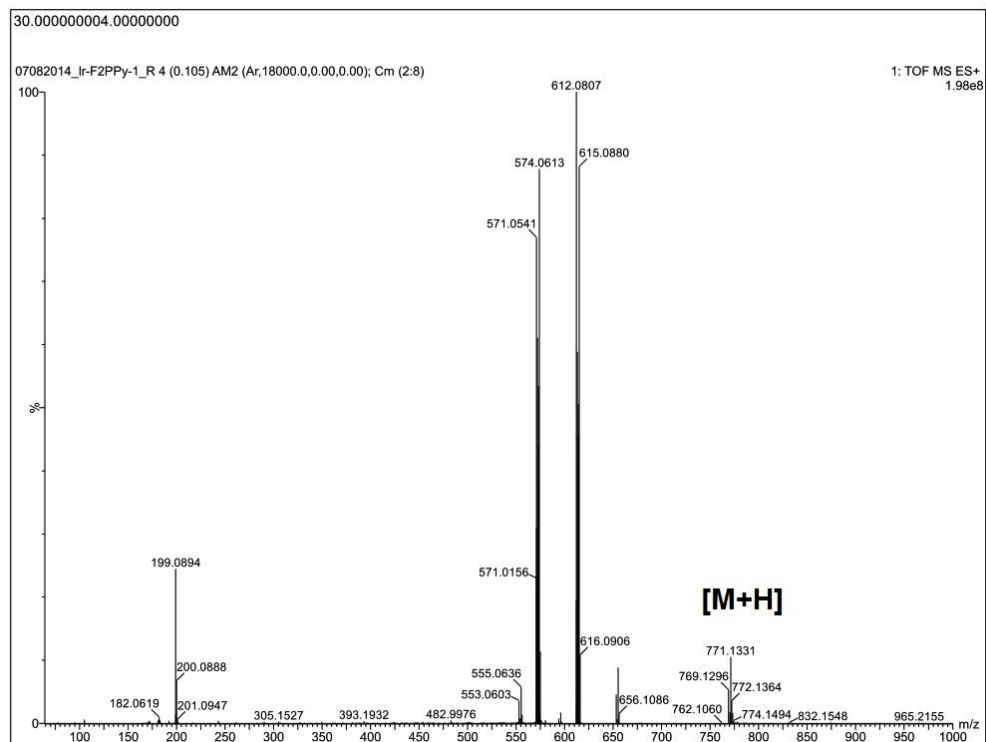

(c)

Fig.S2: ( $^1\text{H}$ ,  $^{19}\text{F}$ ) NMR spectra and HRMS (a, b and c), respectively for **1**.

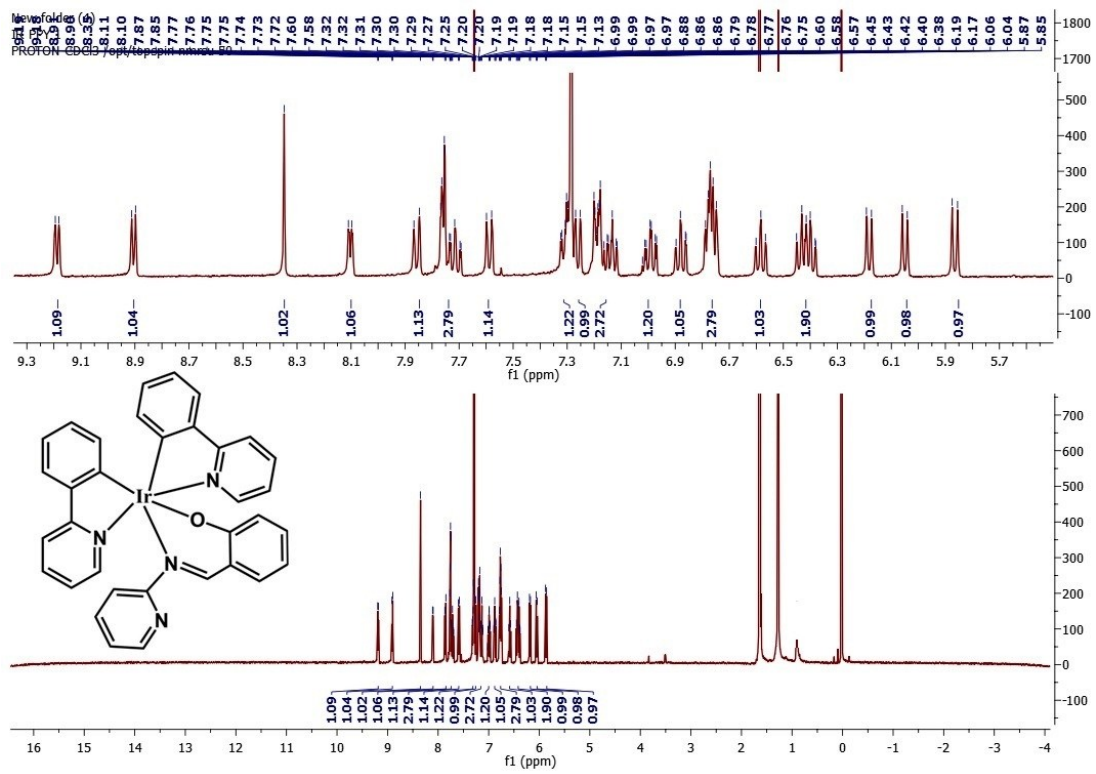

(a)

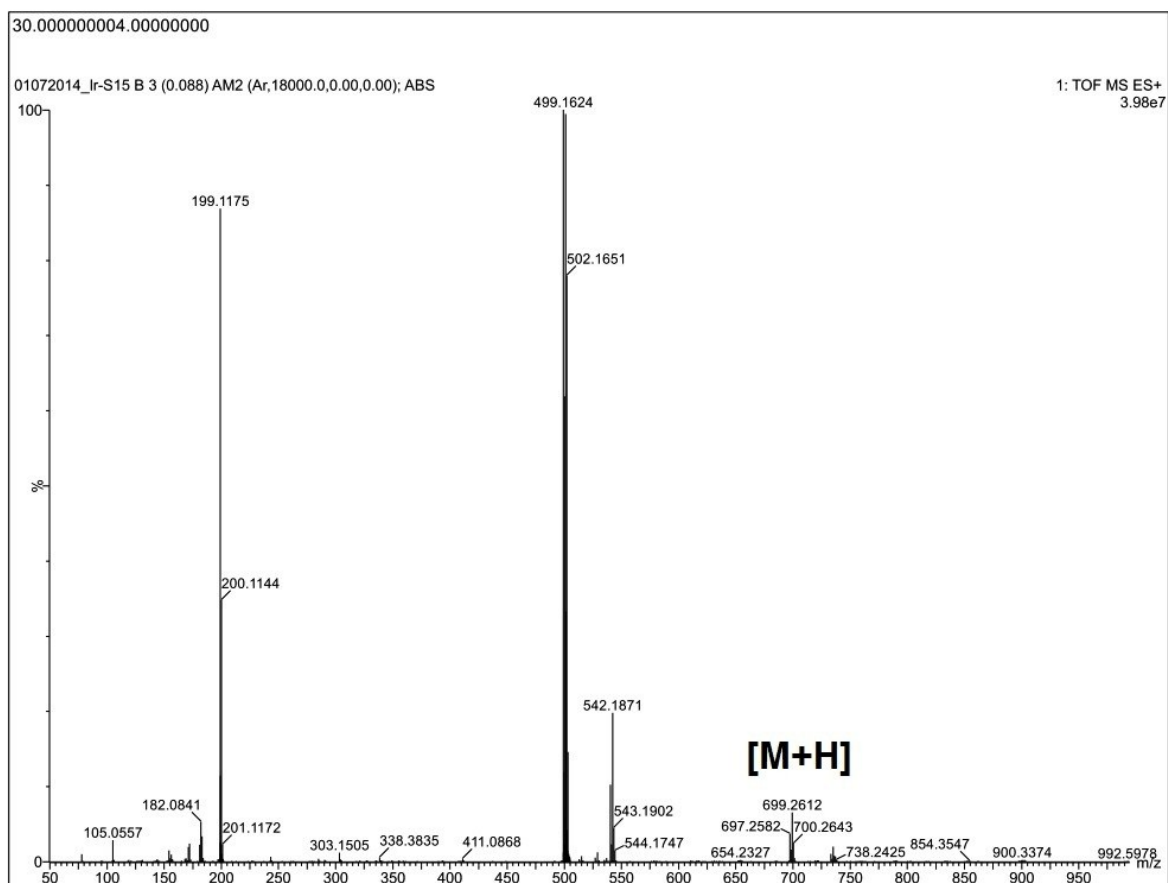

(b)

Fig.S3:  $^1\text{H}$  NMR spectra and HRMS (a and b), respectively for 2.

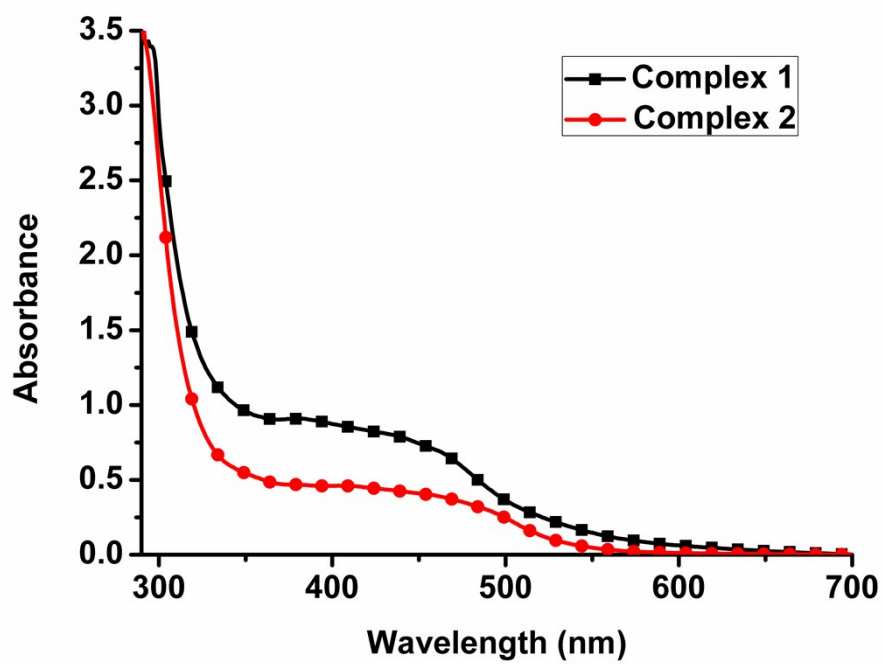

Fig.S4: Solid state absorption spectra of the complexes **1** and **2** .

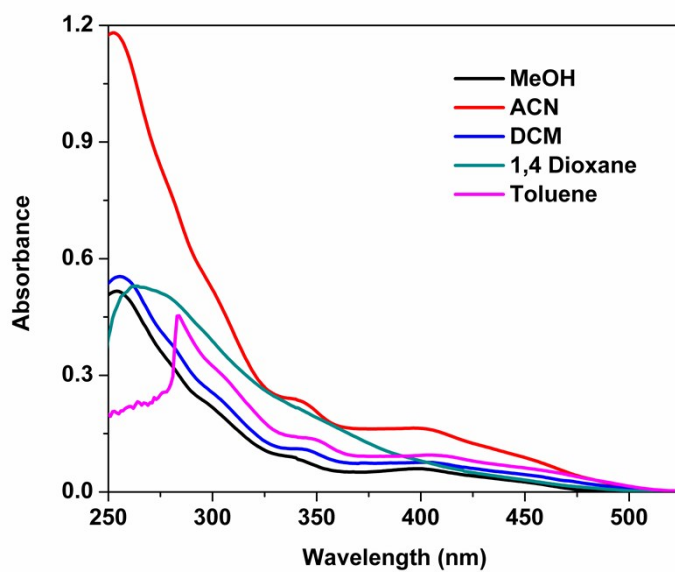

Fig.S5: Absorption spectra of the complex **2** in different organic solvents;  $c=1 \times 10^{-5} \text{M}$ .

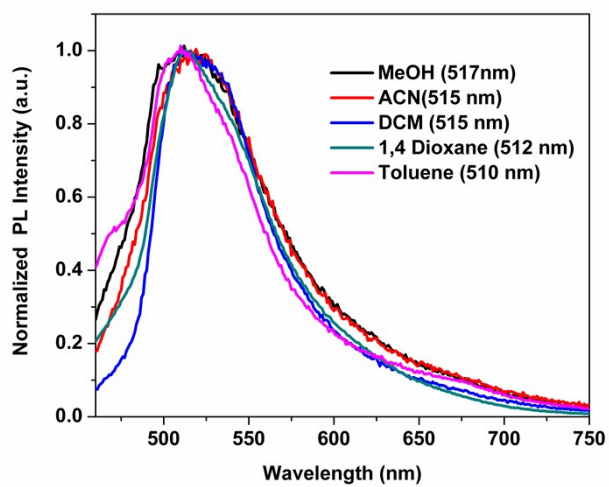

Fig.S6: Normalized emission spectra of the complex **2** in different organic solvents;  $c=1 \times 10^{-5} \text{M}$ .

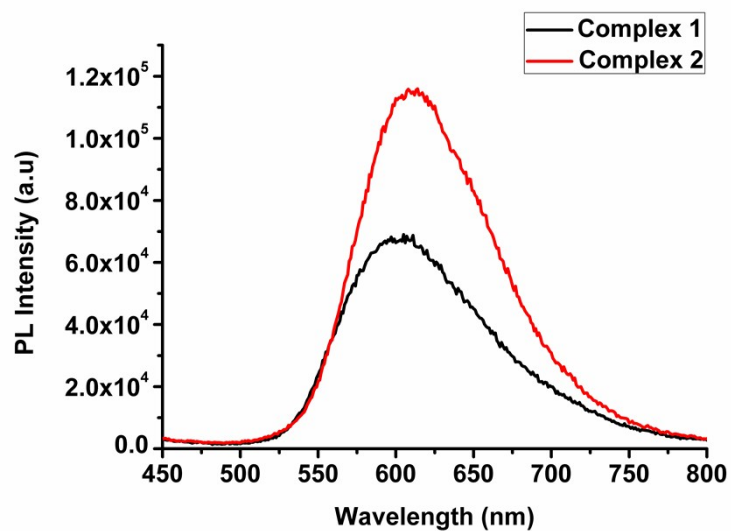

Fig.S7: Solid state emission of the complexes 1 and 2 .

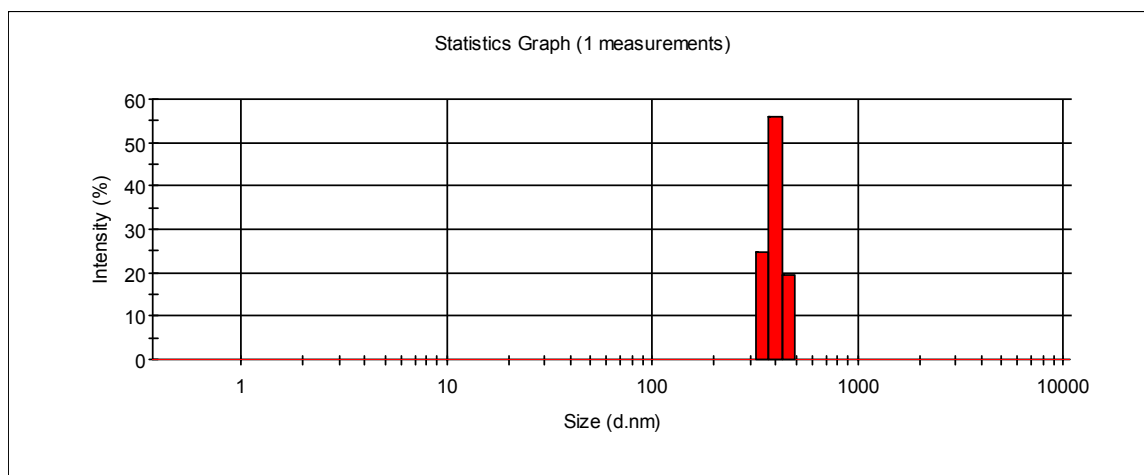

(a)



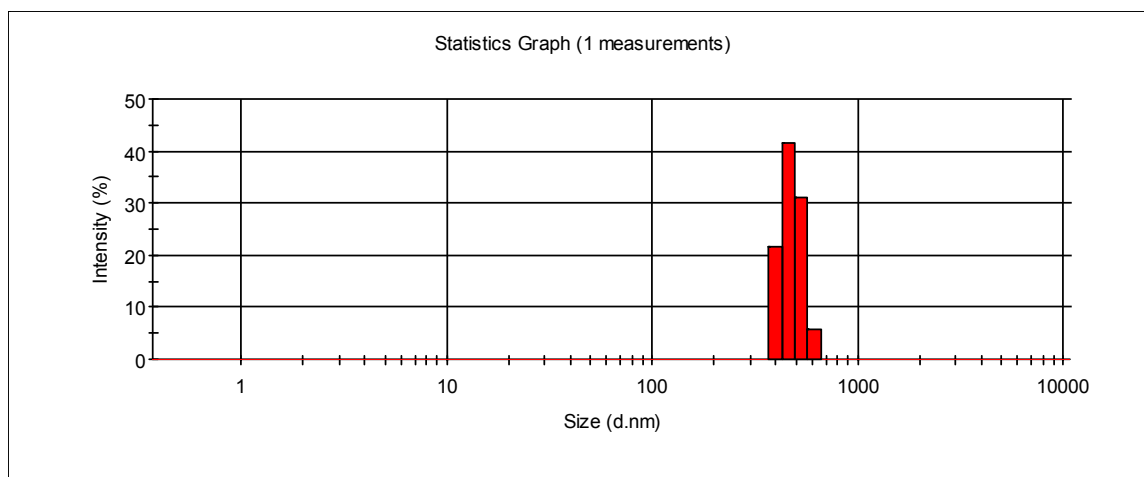

(b)

Fig.S8: Particle size distribution of nano-aggregates of (a) complex 1 and (b) complex 2 formed in a MeOH / water mixture with a 90% water fraction.

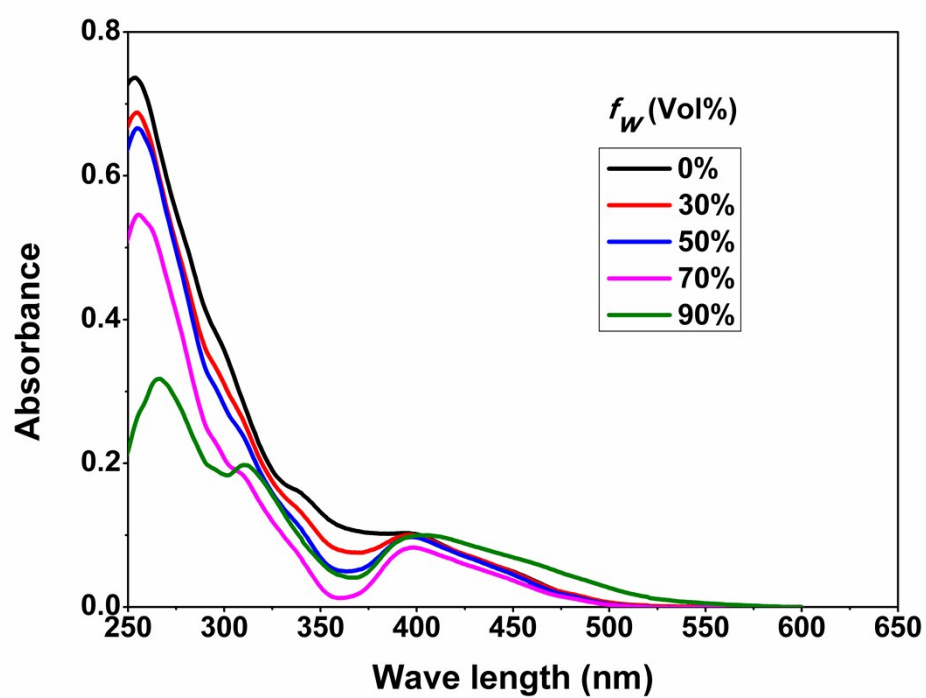

Fig.S9: Absorption spectra of the complex 2 in different water fractions ( $f_w$ );  $c = 1 \times 10^{-5} \text{ M}$ .

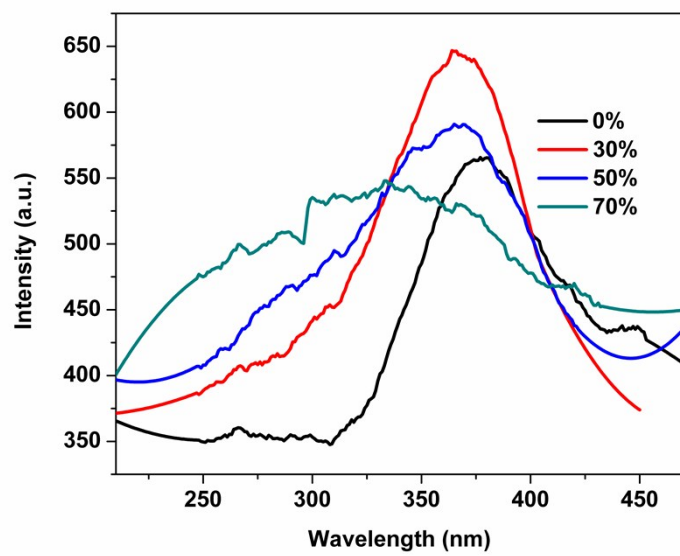

Fig.S10: Excitation spectra of the complex 2 in different water fractions ( $f_w$ );  $c=1 \times 10^{-5} \text{M}$ .
